# Supplementary material for: Efficient aqueous-phase hydrogenation of m-xylylenediamine to 1,3-cyclohexandimethylamine over a highly active and stable ruthenium catalyst
Source: Royal Society of Chemistry journal article supplement (doi:10.1039/d3re00712j), 2024-01-01
Supplement: d3re00712j1.pdf [file d3re00712j1.pdf]

# **Efficient aqueous-phase hydrogenation of m-xylylenediamine to 1,3-cyclohexandimethylamine over a highly active and stable ruthenium catalyst**

Jing Guo<sup>ab</sup>, Heng Shao<sup>b</sup>, Le Gao<sup>a</sup>, Wancheng Ma<sup>a</sup>, Wei Zhang<sup>\*a</sup>, Long Huang<sup>\*a</sup>, Haibin Chu<sup>\*b</sup>

<sup>a</sup> *aBeijing Key Laboratory of Fuels Cleaning and Advanced Catalytic Emission Reduction Technology, College of New Materials and Chemical Engineering., Beijing Institute of Petrochemical Technology, Beijing, 102627, China. E-mail: wzhang @bipt.edu.cn, huangl@bipt.edu.cn*

<sup>b</sup> *bCollege of Chemistry and Chemical Engineering., Inner Mongolia University, Hohhot, 010021, China. E-mail: chuhb@imu.edu.cn*

The supporting information includes:

Figures S1 to S2

Table S1 to S2

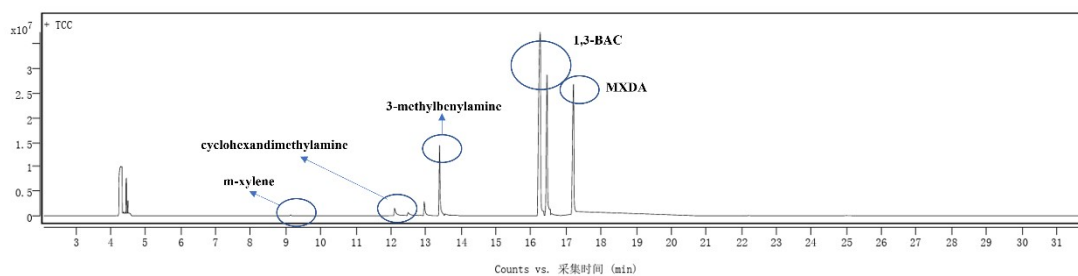

Fig. S1a Gas chromatography of the solution after hydrogenation

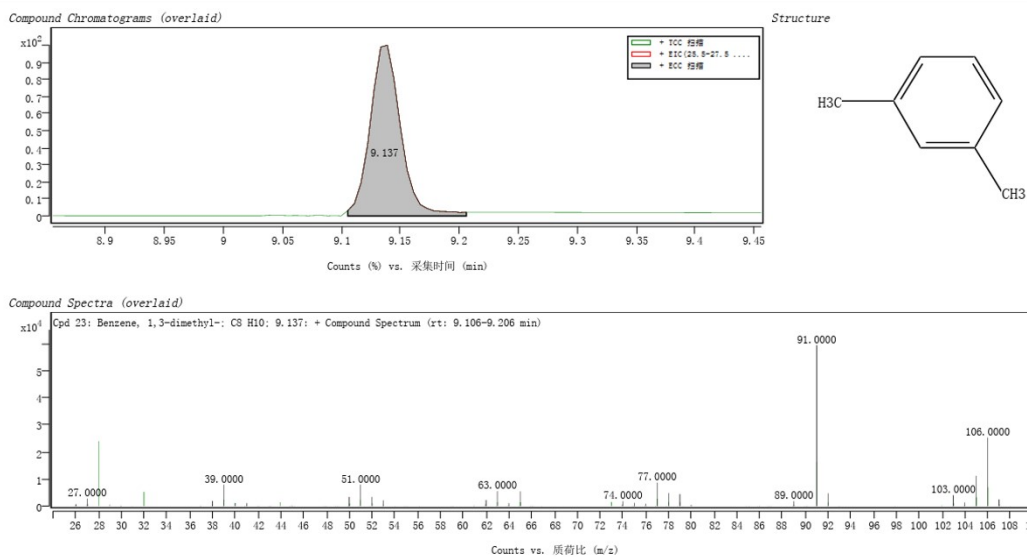

Compound Chromatograms (overlaid)

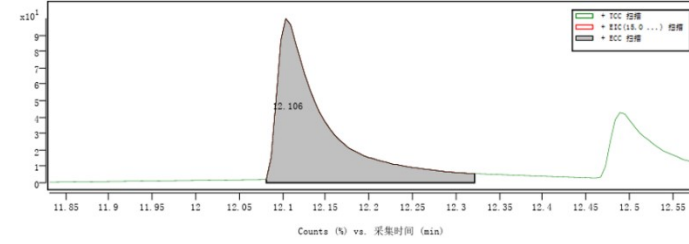

Structure

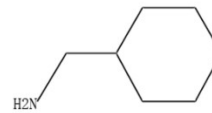

Compound Spectra (overlaid)

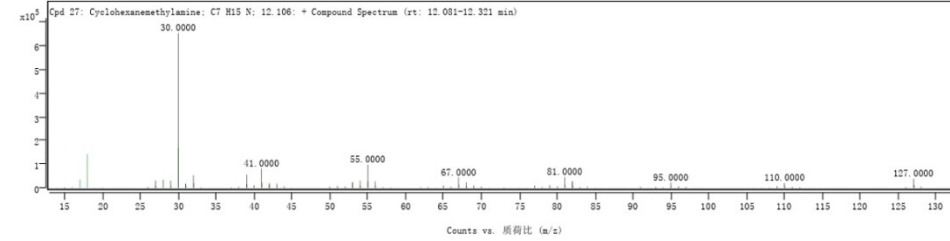

Compound Chromatograms (overlaid)

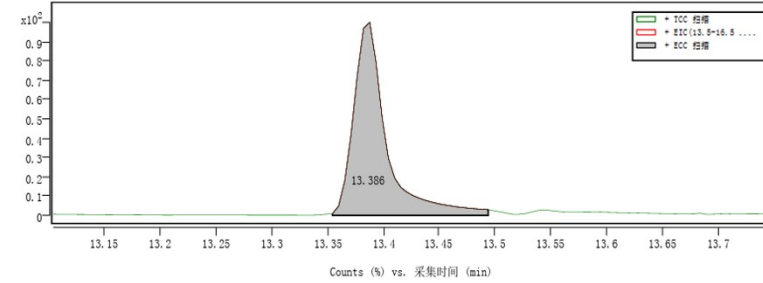

Structure

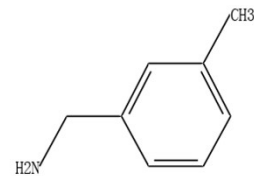

Compound Spectra (overlaid)

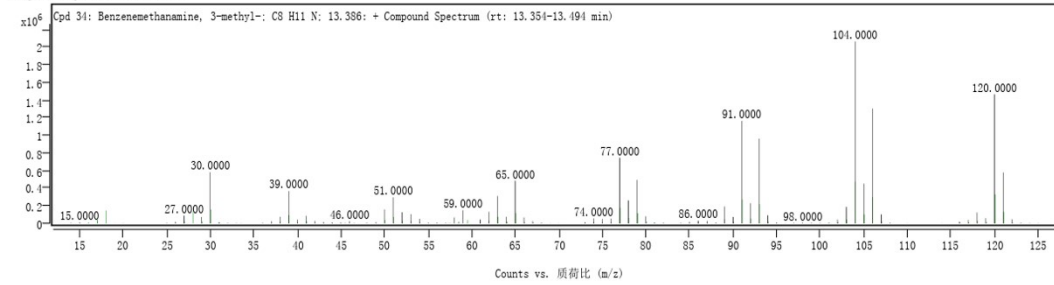

Compound Chromatograms (overlaid)

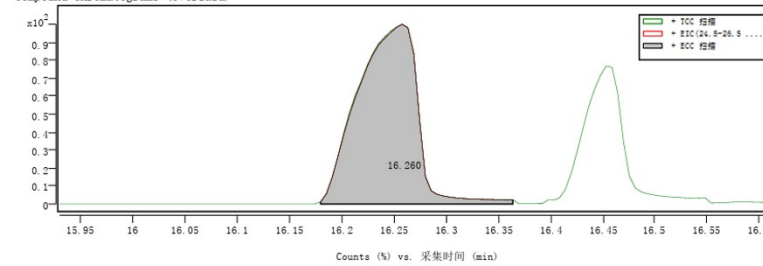

Structure

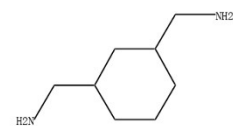

Compound Spectra (overlaid)

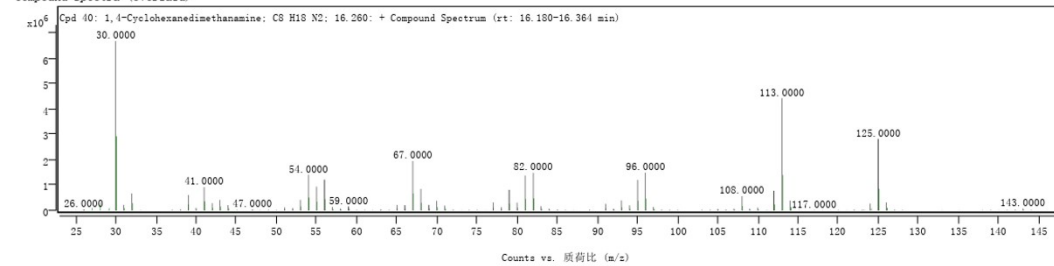

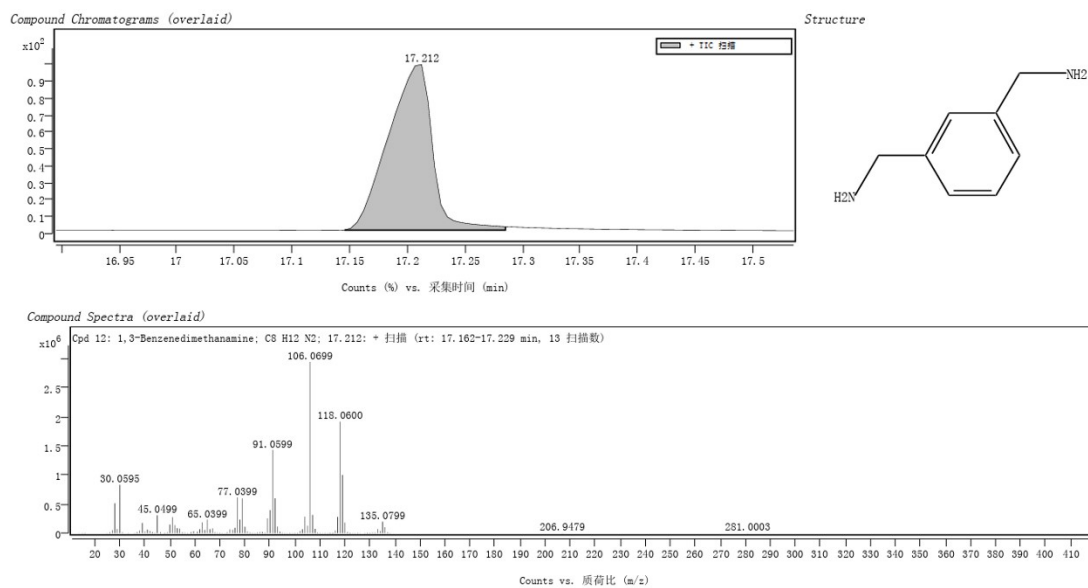

**Fig. S1b** Mass spectra of the detected substances in Fig. 1a

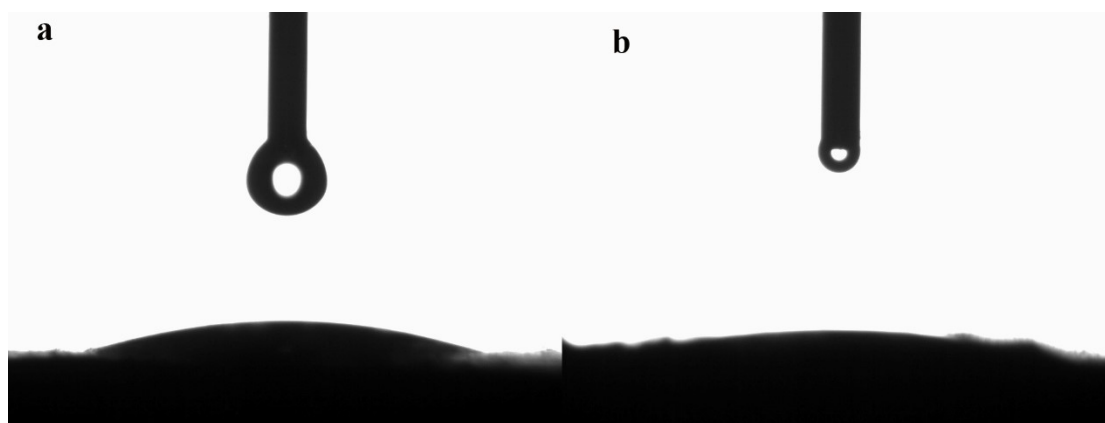

**Fig. S2** Static contact Angle diagram of Ru/Al<sub>2</sub>O<sub>3</sub> (a) and Ru/NH<sub>2</sub>-Al<sub>2</sub>O<sub>3</sub> (b)

**Table S1** Catalytic performances of various supported Ru catalysts

| Catalyst | Conversion(%) | Selectivity(%) | Yield/% |
|----------|---------------|----------------|---------|
|----------|---------------|----------------|---------|

|                                                    |       |       |       |
|----------------------------------------------------|-------|-------|-------|
| Ru/Al <sub>2</sub> O <sub>3</sub>                  | 62.29 | 82.02 | 51.09 |
| Ru/CeO <sub>2</sub>                                | 36.59 | 77.96 | 28.53 |
| Ru/MgO                                             | 20.90 | 83.23 | 17.40 |
| Ru/ZSM-5                                           | 32.54 | 79.14 | 25.75 |
| Ru/NH <sub>2</sub> -Al <sub>2</sub> O <sub>3</sub> | 99.7  | 95.0  | 94.72 |
| Ru/NH <sub>2</sub> -USY                            | 40.1  | 79.2  | 31.76 |

Reaction condition: 10.00 g of MXDA, 0.40 g of catalyst, 90.00 g of H<sub>2</sub>O, 5 h, 4 MPa H<sub>2</sub>, stirring speed: 800 r/min.

**Table S2** Hydrogenation of MXDA to 1,3-BAC in water over catalysts with different Ru contents

| Entry          | Ru content (wt%) | MXDA conversion (%) | 1,3-BAC selectivity (%) |
|----------------|------------------|---------------------|-------------------------|
| 1 <sup>a</sup> | 1.52             | 81.8                | 66.9                    |
| 2 <sup>a</sup> | 2.72             | 93.1                | 67.9                    |
| 3 <sup>a</sup> | 4.31             | 99.9                | 85.7                    |

<sup>a</sup> Reaction conditions: reaction temperature, 120 °C; reaction pressure, 4 MPa H<sub>2</sub>; reaction time, 5 h.
